# Supplementary material for: Interaction of smoking and spicy habits modifies the risk of erectile dysfunction
Source: PubMed Central journal article supplement — Transl Androl Urol. 2024 Jul 15;13(7):1206–18. doi: 10.21037/tau-24-26 (PMC11291414; doi:10.21037/tau-24-26), 2024-07-15
Supplement: tau-13-07-1206-dss.pdf [file tau-13-07-1206-dss.pdf]

## Data Sharing Statement

|                     |                                                                                                                                                     |                                                                                                                                     |
|---------------------|-----------------------------------------------------------------------------------------------------------------------------------------------------|-------------------------------------------------------------------------------------------------------------------------------------|
| <b>Article Info</b> | <a href="https://dx.doi.org/10.21037/tau-24-26">https://dx.doi.org/10.21037/tau-24-26</a>                                                           |                                                                                                                                     |
| <b>Item</b>         | <b>Question</b>                                                                                                                                     | <b>Authors' Response<br/>(place "-" if not applicable)</b>                                                                          |
| 1                   | Would you like to share data collected for your study to others?                                                                                    | Yes                                                                                                                                 |
| 2                   | If not, would you like to share the reason for your decision?                                                                                       |                                                                                                                                     |
| 3                   | What data in particular will be shared?                                                                                                             |                                                                                                                                     |
| 4                   | Any other documents will be shared? Such as study protocol, statistical analysis plan, informed consent form, clinical study report, analytic code. | Statistical analysis plan, informed consent form, and clinical study report will also be shared if requested.                       |
| 5                   | When will data availability begin?                                                                                                                  | From the publication date.                                                                                                          |
| 6                   | When will data availability end?                                                                                                                    | One years within the publication date.                                                                                              |
| 7                   | To whom will you share the data?                                                                                                                    | Medical urologist or someone who are interested in ED or diet.                                                                      |
| 8                   | For what type of analysis or purpose?                                                                                                               | For analysis to investigate the relationship between ED and spicy.                                                                  |
| 9                   | How or where can the data/documents be obtained?                                                                                                    | Emails could be sent to the address below to obtain the shared data: <a href="mailto:dongjieli@csu.edu.cn">dongjieli@csu.edu.cn</a> |
| 10                  | Any other restrictions?                                                                                                                             | We may balance the potential benefits and risks for each request and then provide the data that could be shared.                    |
